# Supplementary material for: Isolation of Fungi and Bacteria Associated with the Guts of Tropical Wood-Feeding Coleoptera and Determination of Their Lignocellulolytic Activities
Source: Hindawi journal article supplement (doi:10.1155/2015/285018), 2015-01-01

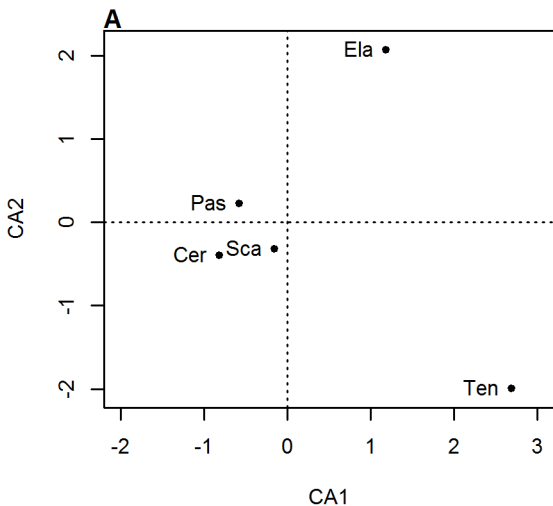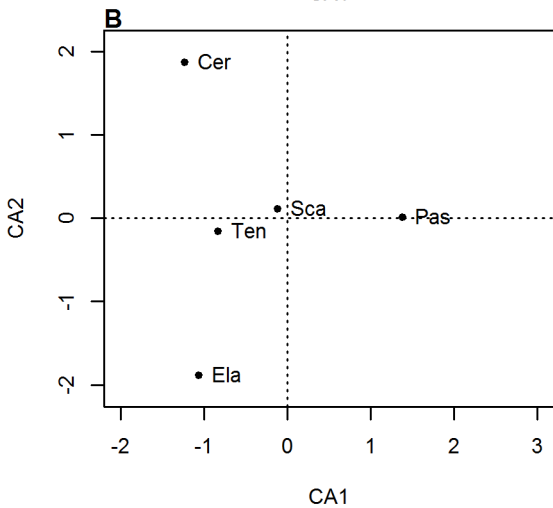

Supplement: f1 [file 285018.f1.pdf]
